# Supplementary material
Source: PubMed Central journal article supplement (PMC5167638)
Supplement: NIHMS830794-supplement-Sup_Info1.pdf [file NIHMS830794-supplement-Sup_Info1.pdf]

## Supplementary information S1: *N*<sup>6</sup>-methyladenosine in simpler life forms

*N*<sup>6</sup>-methyladenosine (m<sup>6</sup>A) has been found in numerous simpler life forms such as viruses and unicellular organisms. Recent findings illuminate its elusive functions in these organisms.

- Viruses

The existence of m<sup>6</sup>A in viruses that integrate their genome into the host genome has been known since the discovery of m<sup>6</sup>A<sup>1,2</sup>. These viruses include SV40, adenovirus, herpes virus, Rous sarcoma virus, influenza virus (reviewed in REF. 3) and more recently, human immunodeficiency virus (HIV)<sup>4-6</sup>. One study reported that m<sup>6</sup>A is crucial for HIV gene expression and replication, as depletions of cellular m<sup>6</sup>A writers inhibit these processes<sup>4</sup>. Another study found that m<sup>6</sup>A at 3' untranslated regions of viral genes recruits YTH domain family (YTHDF) readers and facilitates viral gene expression and replication, which can be further enhanced by overexpressing YTHDF readers<sup>5</sup>. These results suggest m<sup>6</sup>A and its cognate factors have crucial roles in regulating virus life cycle and host-viral interactions.

- Archaea

Little is known about *N*<sup>6</sup>-adenosine methylation in archaea. The existence of m<sup>6</sup>A was reported in tRNA from hyperthermophiles<sup>7</sup> and later on in other archaea as well<sup>8</sup>, But the general function of m<sup>6</sup>A in archaea remains largely unknown.

- Bacteria

m<sup>6</sup>A has been found in many RNA species in bacteria, including rRNA, tRNA, and most recently, mRNA<sup>9,10</sup>. A recent work discovered conserved yet distinct patterns of m<sup>6</sup>A in seven bacterial species including *Escherichia coli*, and associated m<sup>6</sup>A with respiration, amino acids metabolism, stress responses and small RNA regulation<sup>10</sup>.

- Yeast

The abundance of m<sup>6</sup>A in yeast mRNAs is highly dynamic. First detected in sporulating *Saccharomyces cerevisiae*, m<sup>6</sup>A was shown to be present only during meiosis and to be required for meiosis progression and sporulation<sup>11</sup>. Budding yeast Ime4 (mammalian METTL3 homolog) is an m<sup>6</sup>A writer along with two auxiliary factors, Mum2 (mammalian WTAP homolog) and sporulation-specific with a leucine zipper motif protein 1 (Slz1), together forming the complex MIS (Mum2, Ime4, Slz1)<sup>11,12</sup>. Slz1 is crucial for the localization of *N*<sup>6</sup>-adenosine methyltransferase complexes at the nucleolus<sup>13</sup>. Only one YTH domain protein, methylated RNA-binding protein 1 (Mrb1), exists in yeast as a potential m<sup>6</sup>A reader<sup>13,14</sup>. Mrb1 regulates phosphate metabolism by destabilizing the *pho4* mRNA<sup>15</sup>,

although it is unclear whether this function is m<sup>6</sup>A-dependent as the mRNA was not identified with the m<sup>6</sup>A modification<sup>13</sup>. Generally, m<sup>6</sup>A is essential for yeast, as a functional MIS complex is required for normal progression through meiosis<sup>13</sup> and regulates multiple developmental processes during nutrient starvation<sup>12</sup>. A recent study also reported an enrichment of m<sup>6</sup>A in ribosome-bound fractions of mRNA during starvation-induced meiosis, suggesting translation-promoting roles of m<sup>6</sup>A in yeast<sup>16</sup>.

#### References:

- 1 Krug, R. M., Morgan, M. A. & Shatkin, A. J. Influenza viral mRNA contains internal N6-methyladenosine and 5'-terminal 7-methylguanosine in cap structures. *J Virol* **20**, 45-53 (1976).
- 2 Beemon, K. & Keith, J. Localization of N6-methyladenosine in the Rous sarcoma virus genome. *J Mol Biol* **113**, 165-179 (1977).
- 3 Narayan, P. & Rottman, F. M. in *Advances in Enzymology and Related Areas of Molecular Biology* 255-285 (John Wiley & Sons, Inc., 2006).
- 4 Lichinchi, G. *et al.* Dynamics of the human and viral m6A RNA methylomes during HIV-1 infection of T cells. *Nat Microbiol* **1**, 16011 (2016).
- 5 Kennedy, Edward M. *et al.* Posttranscriptional m6A Editing of HIV-1 mRNAs Enhances Viral Gene Expression. *Cell Host Microbe* **19**, 675-685 (2016).
- 6 Tirumuru, N. *et al.* N6-methyladenosine of HIV-1 RNA regulates viral infection and HIV-1 Gag protein expression. *eLife* **5**, e15528 (2016).
- 7 Kowalak, J. A., Dalluge, J. J., McCloskey, J. A. & Stetter, K. O. The Role of Posttranscriptional Modification in Stabilization of Transfer RNA from Hyperthermophiles. *Biochemistry (Mosc)* **33**, 7869-7876 (1994).
- 8 Grosjean, H., Gupta, R. & Maxwell, E. S. in *Archaea: new models for prokaryotic biology* 171-196 (Norfolk Caister Academic Press, 2008).
- 9 Sergiev, P. V. *et al.* N6-Methylated Adenosine in RNA: From Bacteria to Humans. *J Mol Biol* **428**, 2134-2145 (2016).
- 10 Deng, X. *et al.* Widespread occurrence of N6-methyladenosine in bacterial mRNA. *Nucleic Acids Res* **43**, 6557-6567 (2015).
- 11 Clancy, M. J., Shambaugh, M. E., Timpte, C. S. & Bokar, J. A. Induction of sporulation in *Saccharomyces cerevisiae* leads to the formation of N6-methyladenosine in mRNA: a potential mechanism for the activity of the IME4 gene. *Nucleic Acids Res* **30**, 4509-4518 (2002).
- 12 Agarwala, S. D., Blitzblau, H. G., Hochwagen, A. & Fink, G. R. RNA methylation by the MIS complex regulates a cell fate decision in yeast. *PLoS Genet* **8**, e1002732 (2012).
- 13 Schwartz, S. *et al.* High-Resolution Mapping Reveals a Conserved, Widespread, Dynamic mRNA Methylation Program in Yeast Meiosis. *Cell* **155**, 1409-1421 (2013).
- 14 Xu, C. *et al.* Structural Basis for the Discriminative Recognition of N6-Methyladenosine RNA by the Human YT521-B Homology Domain Family of Proteins. *J Biol Chem* **290**, 24902-24913 (2015).
- 15 Kang, H. J. *et al.* A novel protein, Pho92, has a conserved YTH domain and regulates phosphate metabolism by decreasing the mRNA stability of PHO4 in *Saccharomyces cerevisiae*. *Biochem J* **457**, 391-400 (2014).
- 16 Bodi, Z., Bottley, A., Archer, N., May, S. T. & Fray, R. G. Yeast m6A Methylated mRNAs Are Enriched on Translating Ribosomes during Meiosis, and under Rapamycin Treatment. *PLoS ONE* **10**, e0132090 (2015).
