# Supplementary material
Source: PubMed Central journal article supplement (PMC5167638)
Supplement: NIHMS830794-supplement-Sup_Info2.pdf [file NIHMS830794-supplement-Sup_Info2.pdf]

**Supplementary information S2: Roles of m<sup>6</sup>A in RNA species other than mRNAs**

In addition to the functions of *N*<sup>6</sup>-methyladenosine (m<sup>6</sup>A) in mRNA, m<sup>6</sup>A exists and may have regulatory roles in other RNA species.

- MicroRNA (miRNA)

A crosstalk between m<sup>6</sup>A and miRNA function has been hypothesized, as both miRNA-binding sites and a large fraction of m<sup>6</sup>A sites are found in mRNA 3' untranslated regions. m<sup>6</sup>A was first shown to impact miRNA biogenesis by regulating the processing of primary miRNAs (pri-miRNAs)<sup>1</sup>: heterogeneous nuclear ribonucleoproteins A2/B1 was proposed to be the m<sup>6</sup>A reader for pri-miRNAs processing that recruits the Microprocessor complex to facilitate miRNA maturation<sup>2</sup>. A later study also suggested the existence of m<sup>6</sup>A on mature miRNAs, and that the m<sup>6</sup>A eraser fat mass and obesity-associated protein may affect the steady-state level of several miRNAs<sup>3</sup>. Interestingly, a most recent study reported that miRNAs promote site-specific m<sup>6</sup>A deposition by mediating the binding of the m<sup>6</sup>A writer methyltransferase-like protein 3, thereby affecting cell reprogramming<sup>4</sup>.

- Long non-coding RNA (lncRNA)

lncRNAs have several sites of m<sup>6</sup>A<sup>5-7</sup>. The modified adenosine fraction can range from less than 10% to greater than 90% between different lncRNAs<sup>7</sup>. This heterogeneity complicates the elucidation of the role of m<sup>6</sup>A in lncRNA function. The lncRNA X-inactive specific transcript (XIST) was reported to contain 78 m<sup>6</sup>A sites which are required for XIST function of transcriptional silencing of genes on the X chromosome<sup>8</sup>.

- Transfer RNA (tRNA)

tRNA is heavily modified in a wide range of organisms<sup>9,10</sup>. Of these modifications, many feature large chemical moieties with roles in tRNA processing, localization, quality control and stabilization<sup>11</sup>. Yet only one m<sup>6</sup>A site has been found on tRNA, located in tRNA<sup>Val</sup> of *Escherichia coli*<sup>12</sup>, and the positions and role of m<sup>6</sup>A in eukaryotic tRNA are largely unknown.

- Ribosomal RNA (rRNA)

rRNA is decorated with several distinct modifications, most of which are involved in mRNA decoding or biochemical processing and stability of the ribosome. m<sup>6</sup>A has been found on rRNA in both bacteria and human, but not in yeast<sup>13</sup>. Human rRNA contains only two known sites of m<sup>6</sup>A modification, at position A1832 in 18S rRNA and position A4190 in 28S rRNA<sup>14</sup>. Currently the enzymes responsible for these modifications are not known, nor are the modifications' roles in ribosomal biogenesis or function<sup>14-16</sup>.

- Other small RNAs

m<sup>6</sup>A has been found in many small nuclear RNA species including in the splicing factors U2, U4, and U6<sup>17-19</sup>. Additionally, small nucleolar RNAs, which commonly guide the formation of rRNA modifications through sequence-specific base-pairing, contain several m<sup>6</sup>A sites with unknown function<sup>20</sup>.

#### References:

- 1 Alarcon, C. R., Lee, H., Goodarzi, H., Halberg, N. & Tavazoie, S. F. N<sup>6</sup>-methyladenosine marks primary microRNAs for processing. *Nature* **519**, 482-485 (2015).
- 2 Alarcon, C. R. *et al.* HNRNPA2B1 Is a Mediator of m<sup>6</sup>A-Dependent Nuclear RNA Processing Events. *Cell* **162**, 1299-1308 (2015).
- 3 Berulava, T., Rahmann, S., Rademacher, K., Klein-Hitpass, L. & Horsthemke, B. N<sup>6</sup>-adenosine methylation in MiRNAs. *PLoS ONE* **10**, e0118438 (2015).
- 4 Chen, T. *et al.* m<sup>6</sup>A RNA methylation is regulated by microRNAs and promotes reprogramming to pluripotency. *Cell Stem Cell* **16**, 289-301 (2015).
- 5 Dominissini, D. *et al.* Topology of the human and mouse m<sup>6</sup>A RNA methylomes revealed by m<sup>6</sup>A-seq. *Nature* **485**, 201-206 (2012).
- 6 Meyer, K. D. *et al.* Comprehensive Analysis of mRNA Methylation Reveals Enrichment in 3' UTRs and near Stop Codons. *Cell* **149**, 1635-1646 (2012).
- 7 Liu, N. *et al.* Probing N-6-methyladenosine RNA modification status at single nucleotide resolution in mRNA and long noncoding RNA. *RNA* **19**, 1848-1856 (2013).
- 8 Patil, D. P. *et al.* m<sup>6</sup>A RNA methylation promotes XIST-mediated transcriptional repression. *Nature* **537**, 369-373 (2016).
- 9 G R Bjork *et al.* Transfer RNA Modification. *Annu Rev Biochem* **56**, 263-285 (1987).
- 10 Agris, P. F., Vendeix, F. A. P. & Graham, W. D. tRNA's Wobble Decoding of the Genome: 40 Years of Modification. *J Mol Biol* **366**, 1-13 (2007).
- 11 El Yacoubi, B., Bailly, M. & de Crecy-Lagard, V. Biosynthesis and function of posttranscriptional modifications of transfer RNAs. *Annu Rev Genet* **46**, 69-95 (2012).

- 12 Saneyoshi, M., Harada, F. & Nishimura, S. Isolation and characterization of N6-methyladenosine from Escherichia coli valine transfer RNA. *Biochim Biophys Acta* **190**, 264-273 (1969).
- 13 Sergiev, P. V. *et al.* N6-Methylated Adenosine in RNA: From Bacteria to Humans. *J Mol Biol* **428**, 2134-2145 (2016).
- 14 Piekna-Przybylska, D., Decatur, W. A. & Fournier, M. J. The 3D rRNA modification maps database: with interactive tools for ribosome analysis. *Nucleic Acids Res* **36**, D178-D183 (2008).
- 15 Maden, B. E. H. in *Progress in Nucleic Acid Research and Molecular Biology* 241-303 (Academic Press, 1990).
- 16 Choi, Y. C. & Busch, H. Modified nucleotides in T1 RNase oligonucleotides of 18S ribosomal RNA of the Novikoff hepatoma. *Biochemistry (Mosc)* **17**, 2551-2560 (1978).
- 17 Shimba, S., Bokar, J. A., Rottman, F. & Reddy, R. Accurate and efficient N-6-adenosine methylation in spliceosomal U6 small Nuclear RNA by HeLa cell extract in vitro. *Nucleic Acids Res* **23**, 2421-2426 (1995).
- 18 Gu, J., Patton, J. R., Shimba, S. & Reddy, R. Localization of modified nucleotides in Schizosaccharomyces pombe spliceosomal small nuclear RNAs: modified nucleotides are clustered in functionally important regions. *RNA* **2**, 909-918 (1996).
- 19 Bringmann, P. & Lührmann, R. Antibodies specific for N6-methyladenosine react with intact snRNPs U2 and U4/U6. *FEBS Lett* **213**, 309-315 (1987).
- 20 Linder, B. *et al.* Single-nucleotide-resolution mapping of m6A and m6Am throughout the transcriptome. *Nat Meth* **12**, 767-772 (2015).
